# Supplementary material for: Unveiling Genetic Determinants of Key Compounds in Citrus Leaves through Metabolite-Based Genome-Wide Association Study
Source: Research Square preprint supplement (doi:10.21203/rs.3.rs-7896044/v1), 2025-11-03
Supplement: Supplementary file 1 [file e79116c8bd30661e2c471880.xlsx]

## Sheet: Sheet1
NAD, UDP. Glucose	scaffold_3	44614435	AX-160646369	C	T	.	PASS	ANN=T|synonymous_variant|LOW|Ciclev10023848m.g|Ciclev10023848m.g.v1.0|transcript|Ciclev10023848m.v1.0|protein_coding|4/13|c.744C>T|p.His248His|744/1740|744/1740|248/579||,T|downstream_gene_variant|MODIFIER|Ciclev10023667m.g|Ciclev10023667m.g.v1.0|transcript|Ciclev10023667m.v1.0|protein_coding||c.*3645C>T|||||3645|
NAD, C53H88O15	scaffold_2	22353262	AX-161006125	G	A	.	PASS	ANN=A|downstream_gene_variant|MODIFIER|Ciclev10015580m.g|Ciclev10015580m.g.v1.0|transcript|Ciclev10015580m.v1.0|protein_coding||c.*2919G>A|||||2346|,A|downstream_gene_variant|MODIFIER|Ciclev10017901m.g|Ciclev10017901m.g.v1.0|transcript|Ciclev10017901m.v1.0|protein_coding||c.*12C>T|||||12|,A|intergenic_region|MODIFIER|Ciclev10015580m.g-Ciclev10017901m.g|Ciclev10015580m.g.v1.0-Ciclev10017901m.g.v1.…
NAD	scaffold_2	24302517	AX-160094310	T	C	.	PASS	ANN=C|3_prime_UTR_variant|MODIFIER|Ciclev10014096m.g|Ciclev10014096m.g.v1.0|transcript|Ciclev10014096m.v1.0|protein_coding|4/4|c.*99A>G|||||99|,C|upstream_gene_variant|MODIFIER|Ciclev10017893m.g|Ciclev10017893m.g.v1.0|transcript|Ciclev10017893m.v1.0|protein_coding||c.-1423A>G|||||1423|
Gamma Aminobutyric acid	scaffold_3	43077772	AX-160976946	A	G	.	PASS	ANN=G|upstream_gene_variant|MODIFIER|Ciclev10018912m.g|Ciclev10018912m.g.v1.0|transcript|Ciclev10018912m.v1.0|protein_coding||c.-2781T>C|||||2781|,G|intron_variant|MODIFIER|Ciclev10019263m.g|Ciclev10019263m.g.v1.0|transcript|Ciclev10019262m.v1.0|protein_coding|3/14|c.527+21A>G||||||,G|intron_variant|MODIFIER|Ciclev10019263m.g|Ciclev10019263m.g.v1.0|transcript|Ciclev10019263m.v1.0|protein_coding|3…
Gamma Aminobutyric acid	scaffold_3	44623200	AX-160171290	C	A	.	PASS	ANN=A|upstream_gene_variant|MODIFIER|Ciclev10018975m.g|Ciclev10018975m.g.v1.0|transcript|Ciclev10018975m.v1.0|protein_coding||c.-1470C>A|||||1319|,A|upstream_gene_variant|MODIFIER|Ciclev10018975m.g|Ciclev10018975m.g.v1.0|transcript|Ciclev10019384m.v1.0|protein_coding||c.-1470C>A|||||1319|,A|downstream_gene_variant|MODIFIER|Ciclev10023848m.g|Ciclev10023848m.g.v1.0|transcript|Ciclev10023848m.v1.0|p…
C53H88O15	scaffold_4	231242	AX-159887927	T	C	.	PASS	ANN=C|upstream_gene_variant|MODIFIER|Ciclev10033116m.g|Ciclev10033116m.g.v1.0|transcript|Ciclev10033116m.v1.0|protein_coding||c.-3518A>G|||||3411|WARNING_TRANSCRIPT_NO_START_CODON,C|intron_variant|MODIFIER|Ciclev10032191m.g|Ciclev10032191m.g.v1.0|transcript|Ciclev10032191m.v1.0|protein_coding|4/8|c.163-60A>G||||||,C|intron_variant|MODIFIER|Ciclev10032191m.g|Ciclev10032191m.g.v1.0|transcript|Cicle…
Tyrosine	scaffold_7	5961014	AX-159994656	G	A	.	PASS	ANN=A|upstream_gene_variant|MODIFIER|Ciclev10025161m.g|Ciclev10025161m.g.v1.0|transcript|Ciclev10025161m.v1.0|protein_coding||c.-2712G>A|||||2456|,A|upstream_gene_variant|MODIFIER|Ciclev10025161m.g|Ciclev10025161m.g.v1.0|transcript|Ciclev10025404m.v1.0|protein_coding||c.-3820G>A|||||2456|WARNING_TRANSCRIPT_NO_START_CODON,A|intron_variant|MODIFIER|Ciclev10025999m.g|Ciclev10025999m.g.v1.0|transcrip…
